# Supplementary material for: Poly(dimethylsiloxane)/graphene oxide composite sponge: a robust and reusable adsorbent for efficient oil/water separation
Source: Royal Society of Chemistry journal article supplement (doi:10.1039/c9sm01984g), 2019-01-01
Supplement: c9sm01984g5.pdf [file c9sm01984g5.pdf]

## Supporting information

### **Poly(dimethylsiloxane)/graphene oxide composite sponge: A robust and reusable adsorbent for efficient oil/water separation**

Jiajun Zhao,<sup>1,2</sup> Hongyun Chen,<sup>1</sup> Huijian Ye,<sup>1,\*</sup> Bingpan Zhang,<sup>1,2</sup> and Lixin Xu<sup>1,\*</sup>

1 College of Materials Science and Engineering, Zhejiang University of Technology, Hangzhou 310014, China

2 Jianxing Honors College, Zhejiang University of Technology, Hangzhou 310023, China

\* Corresponding authors:

Huijian Ye, E-mail: huy19@zjut.edu.cn; Lixin Xu, E-mail: gcsxlx@zjut.edu.cn

**Table S1. The Density and Viscosity Values of Tested Oils and Organic Solvents<sup>1</sup>**

|             | density (g cm <sup>-3</sup> ) | viscosity (cP, 20 °C) |
|-------------|-------------------------------|-----------------------|
| DMF         | 0.94                          | 0.92                  |
| chloroform  | 1.48                          | 0.57                  |
| THF         | 0.89                          | 0.55                  |
| soybean oil | 0.90                          | 57.0                  |
| pump oil    | 0.95                          | 90.0                  |

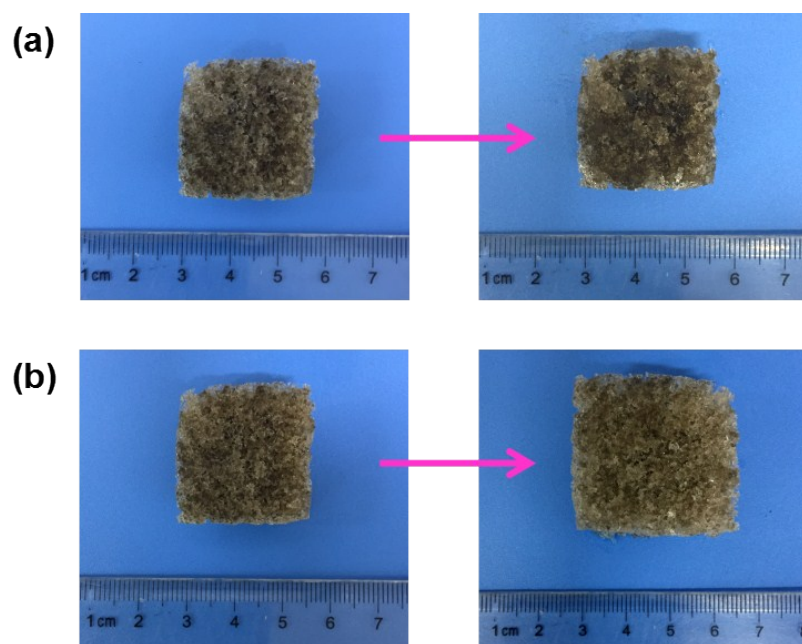

**Figure S1.** Digital photographs of the swelling of the PDMS/GO sponge before and after adsorption of (a) DMF and (b) chloroform, respectively.

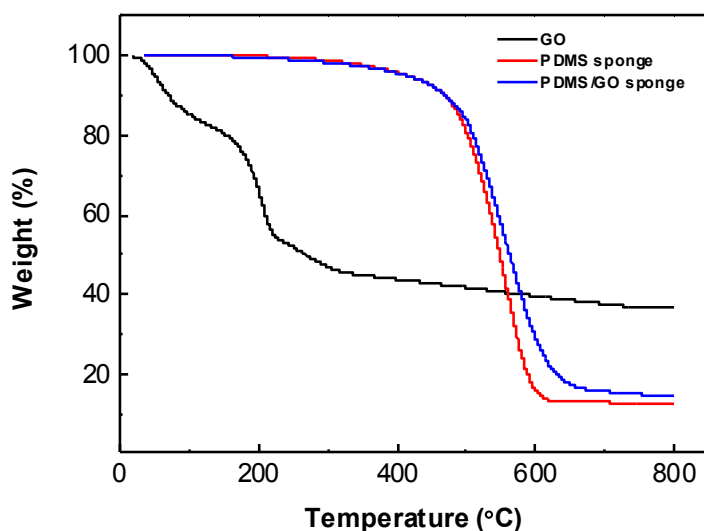

**Figure S2.** TGA curves of GO, pure PDMS sponge and PDMS/GO sponge.

The weight loss of PDMS/GO composite at high temperature was determined from two independent parts: one is the GO carbonization, and the other is thermal degradation of PDMS. The weight loss at 770 °C of GO powder, PDMS sponge, and PDMS/GO sponge was about 63.5%, 87.0%, and 85.3%, respectively. The whole weight loss of composite is composed by two components: nanosheets and polymer matrix. Assuming that the content of GO in composite is  $x$ , the weight loss of GO is  $0.635x$ . Accordingly the content of PDMS in composite is  $(1-x)$ , and the weight loss of PDMS matrix is  $0.870(1-x)$ . The total loss of PDMS/GO sponge is 0.853 at 700 °C, which is comprised by the loss for GO as  $0.635x$  and the weight decrease for PDMS as  $0.870(1-x)$ . Thus, the content of GO in the PDMS/GO sponge could be calculated according to the following formula:

$$0.635x + 0.870(1-x) = 0.853 \quad (1)$$

where the  $x$  is the GO content. From the equation above, the  $x$  was estimated to be about 7.0%.

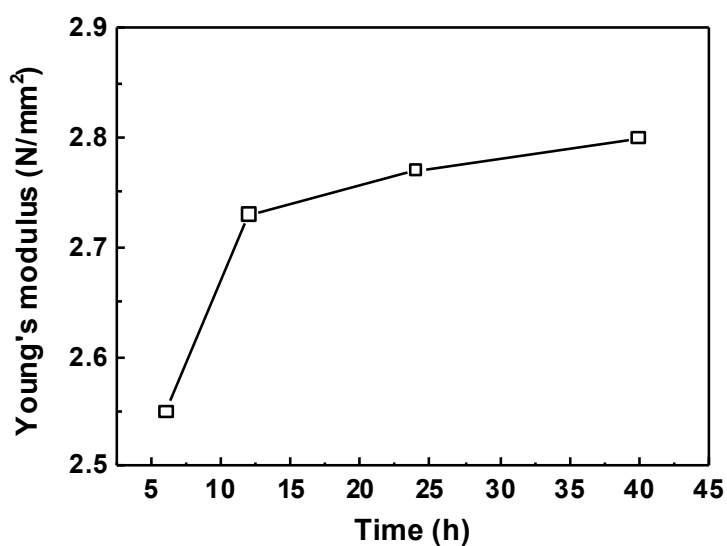

**Figure S3.** The effect of curing time on the Young's modulus of PDMS

**Movie S1:** Contact angle measurement of a n-hexane droplet dropping onto the surface of the PDMS/GO sponge.

**Movie S2:** Selective adsorption of cyclohexane (dyed with Sudan III) on the water with PDMS/GO sponge.

**Movie S3:** Selective adsorption of chloroform (dyed with Sudan III) in water with PDMS/GO sponge.

**Movie S4:** Continuous separation of toluene from water with the vacuum device.
